# Supplementary material for: Cooperation between Monocyte-Derived Cells and Lymphoid Cells in the Acute Response to a Bacterial Lung Pathogen
Source: PubMed Central journal article supplement (PMC4907431; doi:10.1371/journal.ppat.1005691), 2016-06-14
Supplement: ppat.1005691.s004.pdf [file ppat.1005691.s004.pdf]

## S1 Table. Antibodies, tetramers and primers

### Antibodies

| Antigen           | Clone       | Conjugate        | Company       | Reference |
|-------------------|-------------|------------------|---------------|-----------|
| CD3ε              | 145-2C11    | PerCP-Cy5.5      | Biologend     | 100328    |
| CD4               | RM4-5       | eFluor® 450      | eBioscience   | 48-0042   |
|                   |             | PE-CF594         | BD Horizon    | 562285    |
| CD8α              | 53-6.7      | APC              | eBioscience   | 17-0081   |
|                   |             | PE-Cyanine 7     | eBioscience   | 25-0081   |
| CD11b             | M1/70       | APC-eFluor® 780  | eBioscience   | 47-0112   |
| CD11c             | N418        | eFluor® 450      | eBioscience   | 48-0114   |
|                   |             | PE               | eBioscience   | 12-0114   |
|                   | HL3         | PE               | BD Pharmingen | 553802    |
| CD16/32           | 93          | Unconjugated     | eBioscience   | 16-0161   |
| CD44              | IM7         | Biotinylated     | eBioscience   | 13-0441   |
| CD45              | 30-F11      | PE-Cyanine 7     | eBioscience   | 25-0451   |
|                   |             | Biotinylated     | eBioscience   | 13-0451   |
|                   |             | V500             | BD Horizon    | 561487    |
| CD45.1            | A20         | PE               | BD Pharmingen | 553776    |
|                   |             | Biotin           | BD Pharmingen | 553774    |
| CD45.2            | 104         | FITC             | eBioscience   | 11-0454   |
|                   |             | BV421            | BD Pharmingen | 562895    |
| CD62L             | MEL-14      | PE-Cyanine 7     | eBioscience   | 25-0621   |
|                   |             | FITC             | BD Pharmingen | 553150    |
|                   |             | PE               | BD Pharmingen | 553151    |
| CD64              | X54-5/7.1   | Alexa Fluor® 647 | BD Pharmingen | 558539    |
| CD103             | 2E7         | Biotinylated     | eBioscience   | 13-1031   |
| FcεRI             | MAR-1       | PE-Cyanine 7     | eBioscience   | 25-5898   |
| I-A/I-E           | M5/114.15.2 | PerCP-Cy5.5      | BD Pharmingen | 562363    |
| IFNγ              | XMG1.2      | APC              | eBioscience   | 17-7311   |
| IL12p40           | C17.8       | Biotinylated     | eBioscience   | 13-7123   |
| <i>Legionella</i> | Polyclonal  | FITC             | ViroStat      | 6053      |
| Ly6C              | AL21        | Biotinylated     | BD Pharmingen | 557359    |
| Ly6G              | 1A8         | PerCP-Cy5.5      | BD Pharmingen | 560602    |
|                   |             | FITC             | BD Pharmingen | 551460    |
| NK1.1             | PK136       | APC              | BD Pharmingen | 550627    |
| NKp46             | 29A1.4      | Biotinylated     | eBioscience   | 13-3351   |
| Rabbit IgG        | N/A         | FITC             | eBioscience   | 11-4614   |
| Siglec F          | E50-2440    | PE               | BD Pharmingen | 552126    |
|                   |             | BV421            | BD Horizon    | 562681    |
| TCRβ              | H57-597     | APC-eFluor® 780  | eBioscience   | 47-5961   |
|                   |             | PE               | BD Pharmingen | 553172    |
| TCRγδ             | GL3         | PE               | BD Pharmingen | 553178    |

## Tetramers

|               |       |                                          |
|---------------|-------|------------------------------------------|
| CD1d-tetramer | PE    | From Prof Dale Godfrey, Uni Melbourne    |
| MR1-tetramer  | BV421 | From Prof James McCluskey, Uni Melbourne |

## Secondary Staining Reagents

|              |          |               |         |
|--------------|----------|---------------|---------|
| Streptavidin | PE       | eBioscience   | 12-4317 |
|              | APC      | BD Pharmingen | 554067  |
|              | PE-CF594 | BD Horizon    | 562284  |
|              | V500     | BD Horizon    | 561419  |

## Primer Sequences

### *III2a*

Forward: 5'-CCG AAA CCT GCT GAA GAC CA-3'

Reverse: 5'-GGT TTG GTC CCG TGT GAT GT-3'

### *III2b*

Forward: 5'-GAC CAT CAC TGT CAA AGA GTT TC-3'

Reverse: 5'-AGG AAA GTC TTG TTT TTG AAA-3'
